# Supplementary material for: Different Geographic Strains of Dinoflagellate Karlodinium veneficum Host Highly Diverse Fungal Community and Potentially Serve as Possible Niche for Colonization of Fungal Endophytes
Source: MDPI journal article supplement (doi:10.3390/ijms24021672), 2023-01-14
Supplement: s1 [file s1]

## **Supplementary Figures**

**Supplementary Figure S1.** Rarefaction curves of the 13 samples.

**Supplementary Figure S2.** Heatmap analysis of the whole fungal communities living with *Karlodinium veneficum* at class level.

**Supplementary Figure S3.** Phylogenetic tree derived from Maximum Likelihood analysis based on ITS sequences of representative fungal ASVs feature sequences obtained in this study.

**Supplementary Figure S4.** The phylogenetic relationships of the 13 *Karlodinium veneficum* investigated in this work.

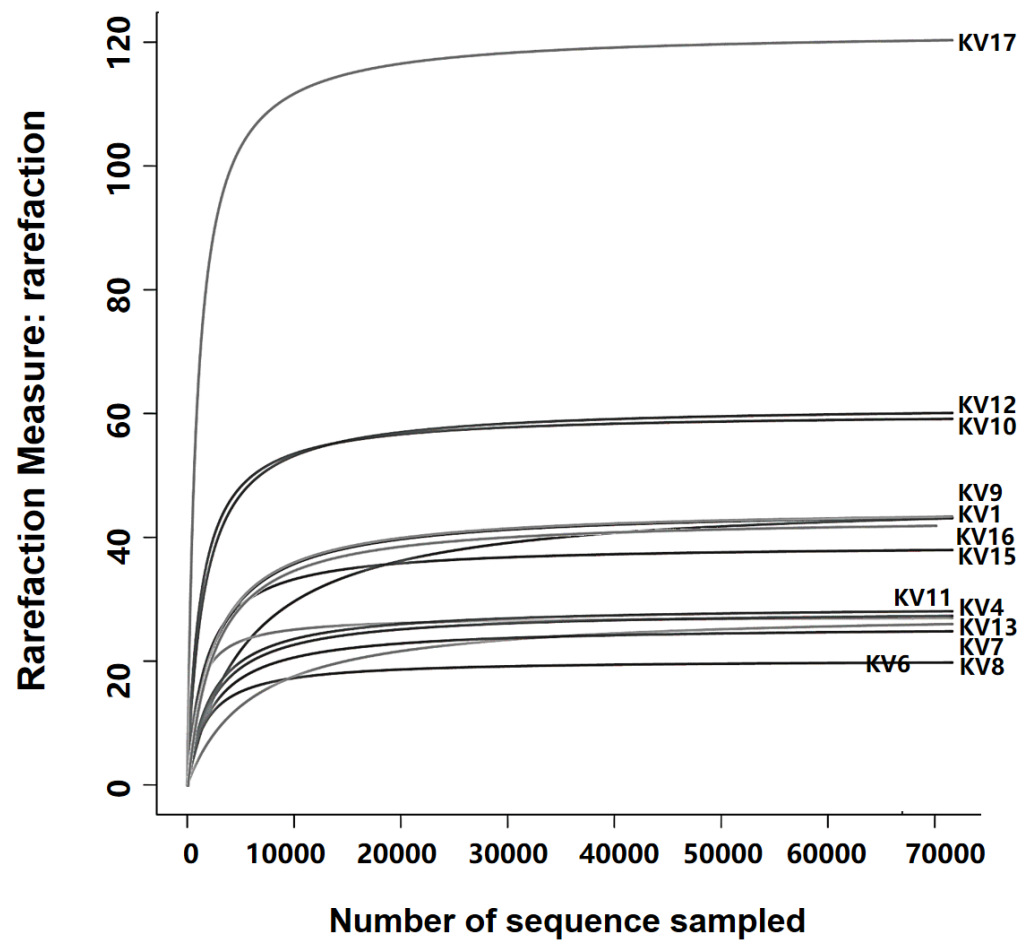

**Supplementary Figure S1.** Rarefaction curves of the 13 samples.

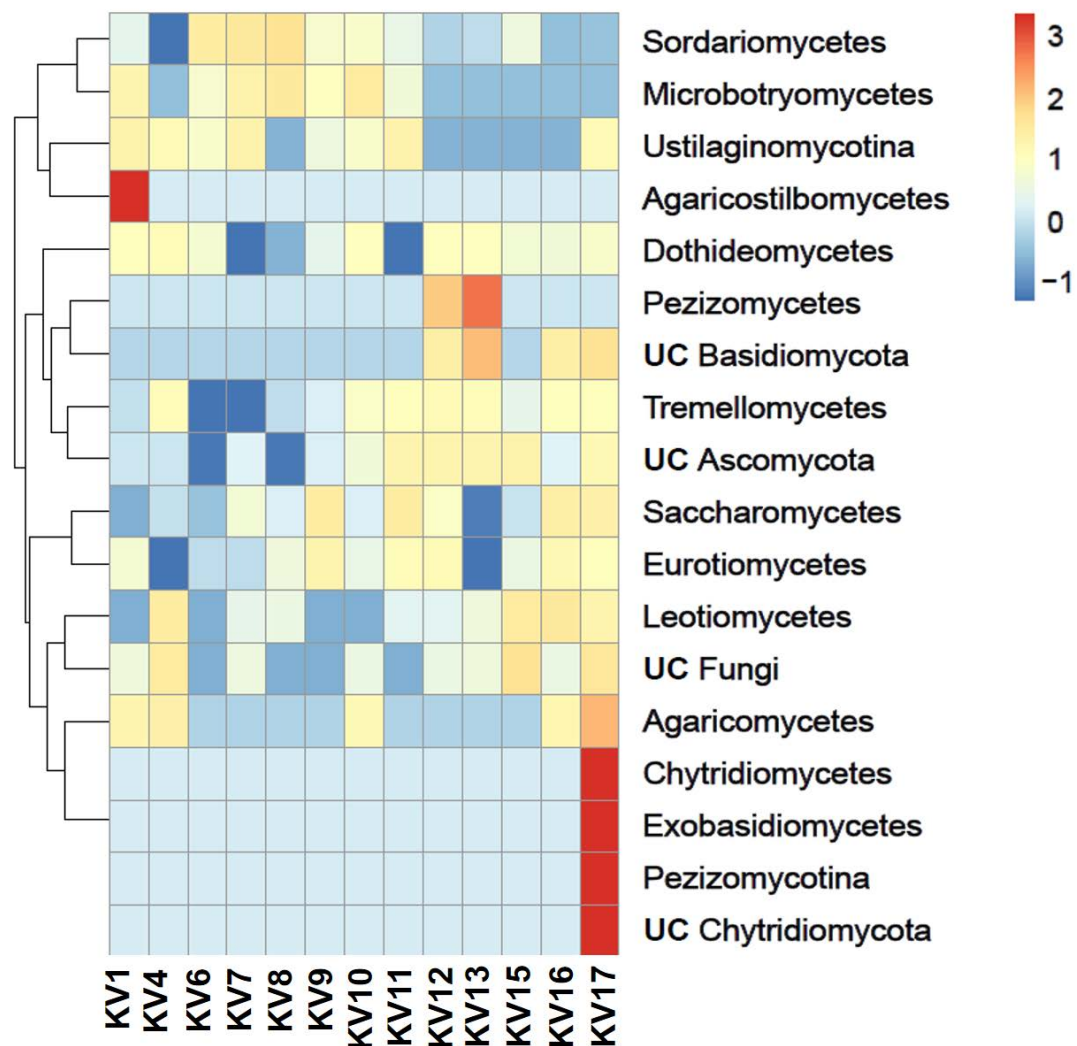

**Supplementary Figure S2.** Heatmap analysis of the whole fungal communities living with *Karlodinium veneficum* at class level. UC: unclassified.

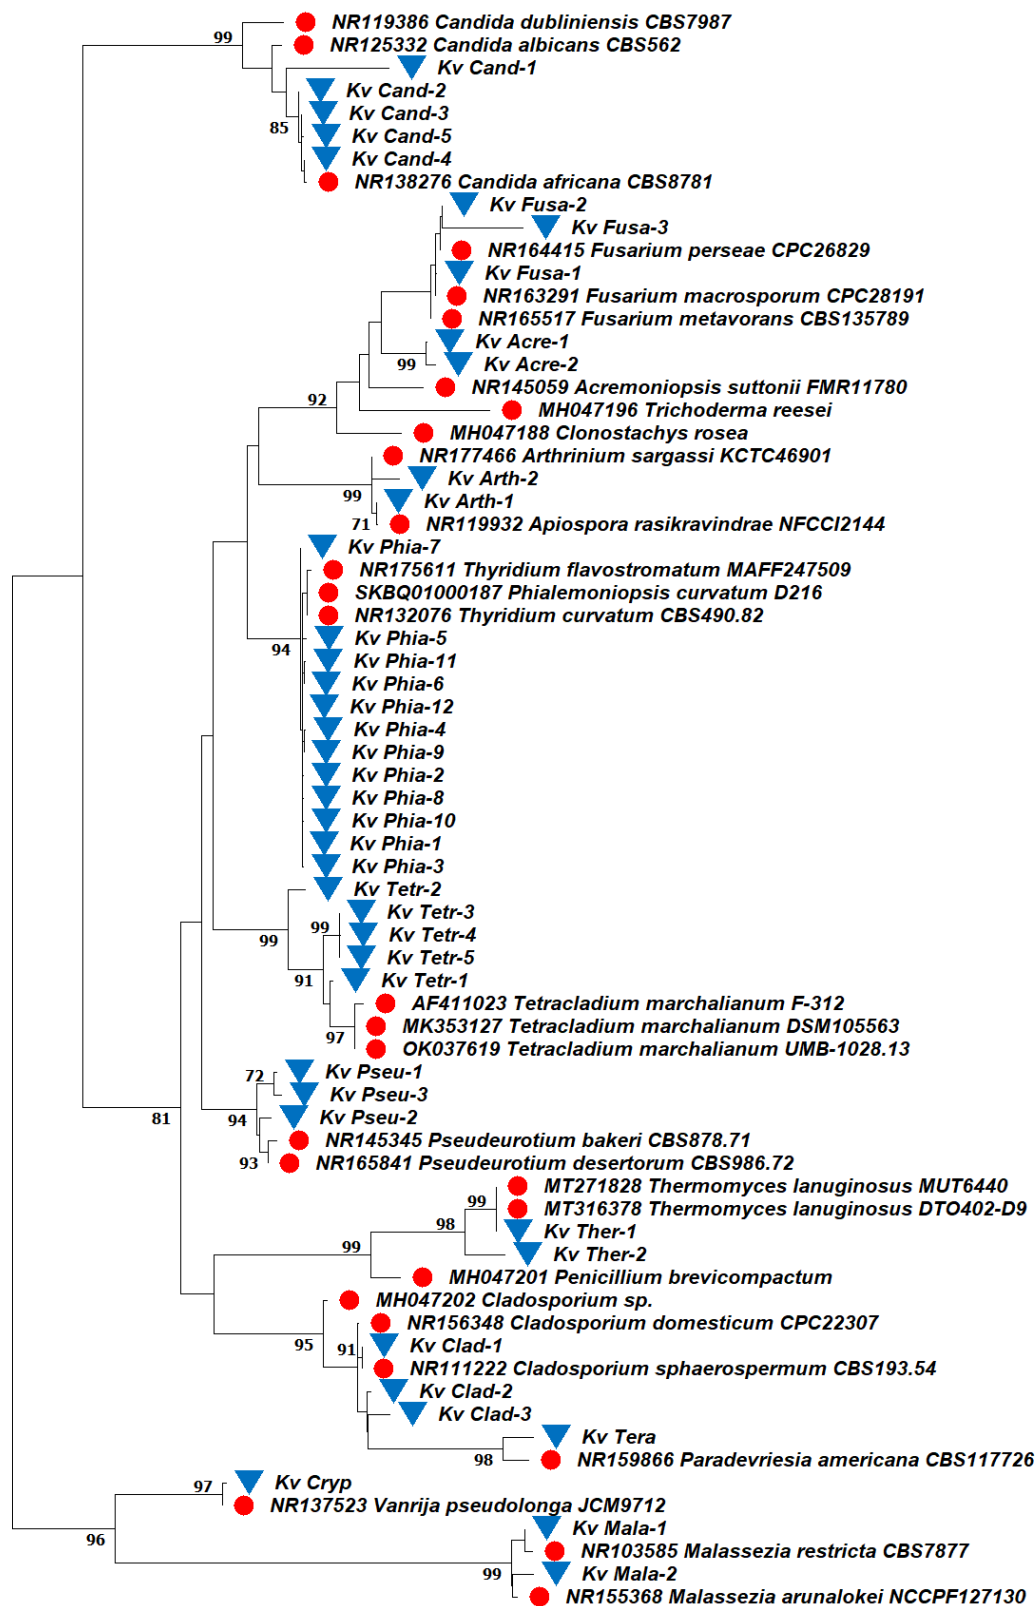

**Supplementary Figure S3.** Phylogenetic tree derived from Maximum Likelihood analysis based on 208-bp of 5.8S-ITS2 DNA sequence data. Analysis was performed in MEGA X (Kumar et al., 2018), using General Time Reversible (Nei and Kumar, 2000) and gamma-distribution rate variation (GTR+G model) with 1000 bootstrap replicates. The analysis involved 70 nucleotide sequences, including representative fungal ASVs feature sequences obtained in this study (● with Kv prefix), and the reference fungal strain sequences retrieved from GenBank (▼ with accession number). ML bootstrap support (BS) values are shown at the nodes (BS > 70 %). The tree is drawn to scale, with branch lengths measured in the number of substitutions per site. The scale bar indicates the nucleotide substitutions per position.

References;

- Kumar, S.; Stecher, G.; Li, M.; Knyaz, C.; Tamura, K. MEGA X: Molecular evolutionary genetics analysis across computing platforms. *Molecular Biology and Evolution* **2018**, *35*, 1547-1549.
- Nei, M.; Kumar, S. Molecular Evolution and Phylogenetics. **2000**, Oxford University Press, New York.

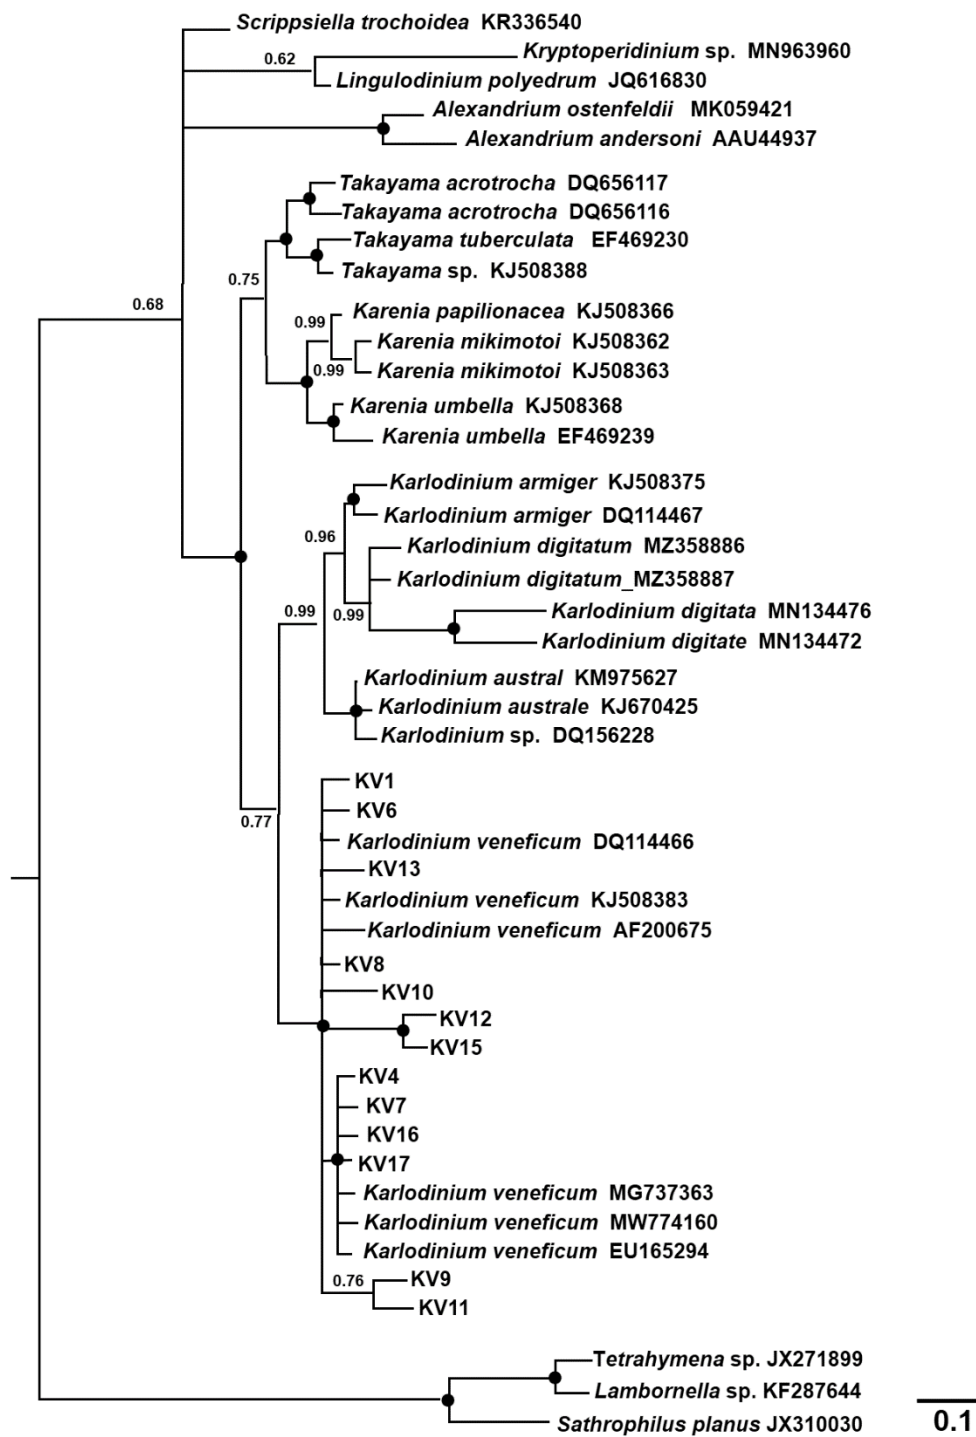

**Supplementary Figure S4.** The phylogenetic relationships of the 13 *Karlodinium veneficum* investigated in this work. Phylogenetic reconstruction was inferred from partial LSU rRNA gene sequences using the Bayesian-Inference (BI) method as described in Deng et al. (2019, 2021). Numbers at the nodes represent BI posterior probabilities. Black circles (●) indicate maximal support (1.00). GenBank accession number of each sequence is noted following the species name. All branches are drawn to scale.

References;

- Deng, Y.Y.; Li, F.T.; Hu, Z.X.; Yue, C.X.; Tang, Y.Z. The implication inferred from the expression of small heat-shock protein genes in dinoflagellate resting cysts buried in marine sediment. *Diversity* **2021**, *13*, 471.
- Deng, Y.Y.; Hu, Z.X.; Chai, Z.Y.; Tang, Y.Z. Cloning and comparative studies of proliferating cell nuclear antigen (PCNA) genes for nine dinoflagellates. *Journal of Applied Phycology* **2019**, *31*, 2969-2979.
