# Supplementary material for: Different Geographic Strains of Dinoflagellate Karlodinium veneficum Host Highly Diverse Fungal Community and Potentially Serve as Possible Niche for Colonization of Fungal Endophytes
Source: MDPI journal article supplement (doi:10.3390/ijms24021672), 2023-01-14
Supplement: s1 [file s1]

**Table S7. Control information from other 5 cultures of microalgae examined for fungal presence with same high-throughput gene amplicon sequencing targeted at rDNA ITS region.** All these 5 cultures and the 13 *Karlodinium veneticum* cultures examined in this study were cultivated and processed in the same protocols in our laboratory.

| Samples | Genus/species                      | Origin/ Isolation date                                    | Accession No. <sup>1</sup> | <i>Thyridium</i> <sup>2</sup> | <i>Pseudeurotium</i> | <i>Candida</i> |
|---------|------------------------------------|-----------------------------------------------------------|----------------------------|-------------------------------|----------------------|----------------|
| KD      | <i>Karlodinium decipens</i>        | Jiaozhou Bay, Shandong Province (Yellow Sea, China), 2019 | PRJNA892752                | Y <sup>3</sup>                | N                    | N              |
| PF      | <i>Pselodinium fusus</i>           | Jiaozhou Bay, Shandong Province (Yellow Sea, China), 2019 | PRJNA892740                | N                             | N                    | Y              |
| BB      | <i>Biecheleria brevisulcata</i>    | Ningde, Fujian Province (East China Sea), 2018            | PRJNA892739                | N                             | N                    | N              |
| AA      | <i>Aureococcus anophagefferens</i> | USA, 1986 <sup>4</sup>                                    | PRJNA892281                | Y                             | N                    | Y              |
| AS      | <i>Akashiwo sanguinea</i>          | Northport Bay, New York, USA, 2011                        | PRJNA892755                | N                             | N                    | N              |

<sup>1</sup> The accession number of the high-throughput gene amplicon sequencing data for rDNA ITS region of the sample in the NCBI Short Read Archive (SRA) database.

<sup>2</sup> *Thyridium*: formerly as *Phialemoniopsis* (Sugita and Tanaka, 2022, MycoKeys, 86, 147) and *Phialemonium* (Perdomo et al. 2013, Mycologia, 105, 398-421).

<sup>3</sup> Y/N: the fungal genus has been/ has not been detected in the sample.

<sup>4</sup> The culture of *Aureococcus anophagefferens* strain CCMP1984 (CCMP, Culture Collection of Marine Phytoplankton) was obtained from Stony Brook University and cultured in our laboratory since 2013.
